# Supplementary material
Source: Research Square preprint supplement (doi:10.21203/rs.3.rs-8784943/v1)
Supplement: Supplementary file 1 [file 0945f653108b0b86e9ffc1f5.docx]

**Supplementary material**

**Table S1 Clinical information of 6 patient isolates**

| **Characteristics** | Age (years) | Gender | Specimen Type | *bla*NDM-1 | TGC(MIC) | CZA(MIC) |
| --- | --- | --- | --- | --- | --- | --- |
| CRECC112 | 89 | Female | Sputum | + | 0.5 | >128 |
| CRECC78 | 85 | Male | Bile | + | 0.5 | >128 |
| CRECC404 | 48 | Male | Drainage fluid | + | 0.5 | >128 |
| CRECC414 | 72 | Female | Sputum | + | 0.25 | >128 |
| CRECC421 | 82 | Male | Bronchoalveolar lavage fluid | + | 0.5 | >128 |
| CRECC423 | 83 | Female | Sputum | + | 0.5 | >128 |

**Fig S2 Amino acid mutation site information**

**
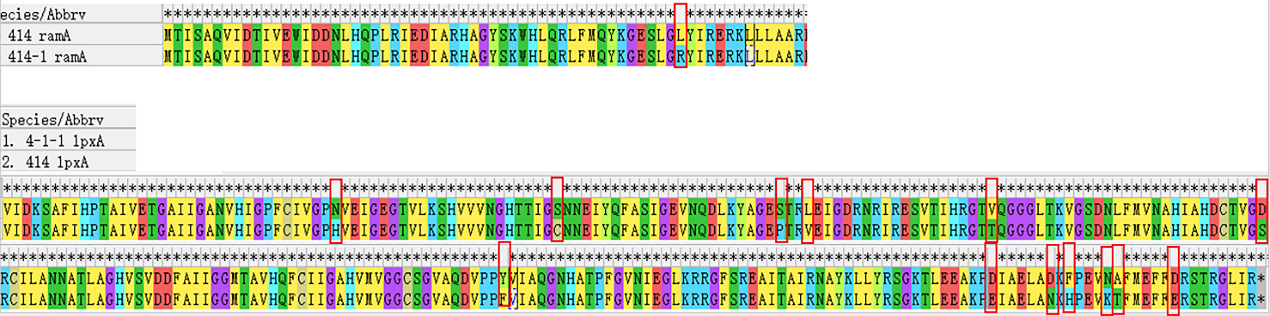
**

**Table S3 Primer sequences**

| Primer | Sequence |
| --- | --- |
| *rpoB*, Forward | 5’-AAGGCGAATCCAGCTTGTTCAGC-3’ |
| *rpoB*, Reverse | 5’-TGACGTTGCATGTTCGCACCCATCA-3’ |
| acrA, Forward | 5’-TCACCACCGAATTACCTGGC-3’ |
| acrA, Reverse | 5’-GAGACTCACCGGCTTTCACA-3’ |
| acrB, Forward | 5’-ATCCTTGCGGCCTTTGGATT-3’ |
| acrB, Reverse | 5’-CTTCGGCGGTAAACCCTCTT-3’ |
| RamA, Forward | 5’-AAGCCTGGGGCGCTATATTC-3’ |
| RamA, Reverse | 5’-GGGTAAAGATGCGCGTGAAC-3’ |
| TolC, Forward | 5’-ACGCCTCTATCAGCAGCATC-3’ |
| TolC, Reverse | 5’-CGTCGAGCACGTCAACAATC-3’ |
| wcaD, Forward | 5’-CTGATGATTGCCCTGGGGTT-3’ |
| wcaD, Reverse | 5’-GCATGGTGGAGGTGACGTAT-3’ |
| wcaE, Forward | 5’-ATTCTCAATGGGTGGCGTGT-3’ |
| wcaE, Reverse | 5’-TCGTCCGCAGGCGTAATAAA-3’ |
| wzC, Forward | 5’-GACGTGGAATCTGGTCAGCA-3’ |
| wzC, Reverse | 5’-CACATCACCCACGGTACTGG-3’ |
| oqxB, Forward | 5’- TATCATTCTCAAAACGTCTCAGGAC -3’ |
| oqxB, Reverse | 5’- TCCCATTTCAATACGCGCCA -3’ |
| 112 phoQ, Forward | 5’-CCGGAAATTAGCTTTGTTGGCG-3’ |
| 112 phoQ, Reverse | 5’-GTTCGTTATCCGTTACCCGC-3’ |
| 414 phoQ, Forward | 5’-GCGTTGAAATGCCCGAGAAC-3’ |
| 414 phoQ, Reverse | 5’-ACGGGATATCTCTTTGCGCC-3’ |
| 112 ompC, Forward | 5’-CTTCCTGGACCGACGTTCTG-3’ |
| 112 ompC, Reverse | 5’-CTGCAACGCGAAGTTCAGAC-3’ |
| 414 ompC, Forward | 5’- TAACGACTACTTTGCGGGCG-3’ |
| 414 ompC, Reverse | 5’-GGATTTCACCGCATACTGGC-3’ |
| 112 ompF, Forward | 5’-TTGGTGTTCAGTACCTGGGC-3’ |
| 112 ompF, Reverse | 5’-CATAAGCACCCACAATGCCG-3’ |
| 414 ompF, Forward | 5’-CAGTGGTAATCCCTGCCCTG-3’ |
| 414 ompF, Reverse | 5’-GCGTCGTTGTTGTTGGTGTC-3’ |
| 112 phoQ, Forward | 5’-CCGGAAATTAGCTTTGTTGGCG-3’ |
| 112 phoQ, Reverse | 5’-GTTCGTTATCCGTTACCCGC-3’ |
| 414 phoQ, Forward | 5’-GCGTTGAAATGCCCGAGAAC-3’ |
| 414 phoQ, Reverse | 5’-ACGGGATATCTCTTTGCGCC-3’ |
| 112 marA, Forward | 5’-GGAATCTCCGCTCTCCCTTG-3’ |
| 112 marA, Reverse | 5’-TTTGGGCAATCTCCGTCAGC-3’ |
| 414 marA, Forward | 5’-ATAACCTGGAATCGCCGCTC-3’ |
| 414 marA, Reverse | 5’-ACCTAGTGAATGGCCGGTCT-3’ |
| blaNDM, Forward | 5’-TTGGCCCGCTCAAGGTATTT-3’ |
| blaNDM, Reverse | 5’-TTGGCCTTGCTGTCCTTGAT-3’ |
| blaCTX-M, Forward | 5’-GCTTTATGCGCAGACGAGTG-3’ |
| blaCTX-M, Reverse | 5’-GTTCATGGCGGTATTGTCGC-3’ |
| 112 blaTEM, Forward | 5’-TGGGTCTCGCGGTATCATTG-3’ |
| 112 blaTEM, Reverse | 5’-CATAGTTGCCTGACTCCCCG-3’ |
| 414 blaSHV, Forward | 5’-GCTGGAGCGAAAGATCCACT-3’ |
| 414blaSHV, Reverse | 5’-CTAGCTCCGGTCTTATCGGC-3’ |
